# Supplementary material for: Kdm1a safeguards the topological boundaries of PRC2-repressed genes and prevents aging-related euchromatinization in neurons
Source: PubMed Central journal article supplement (PMC10920760; doi:10.1038/s41467-024-45773-3), 2024-03-07
Supplement: 41467_2024_45773_MOESM1_ESM.pdf [file 41467_2024_45773_MOESM1_ESM.pdf]

Kdm1a safeguards the topological boundaries of PRC2-repressed genes and prevents aging-related euchromatinization in neurons

del Blanco et al.

## **Supplementary materials**

- Supplementary Figures 1 to 9 with legends
- Supplementary Table 1
- Supplementary References

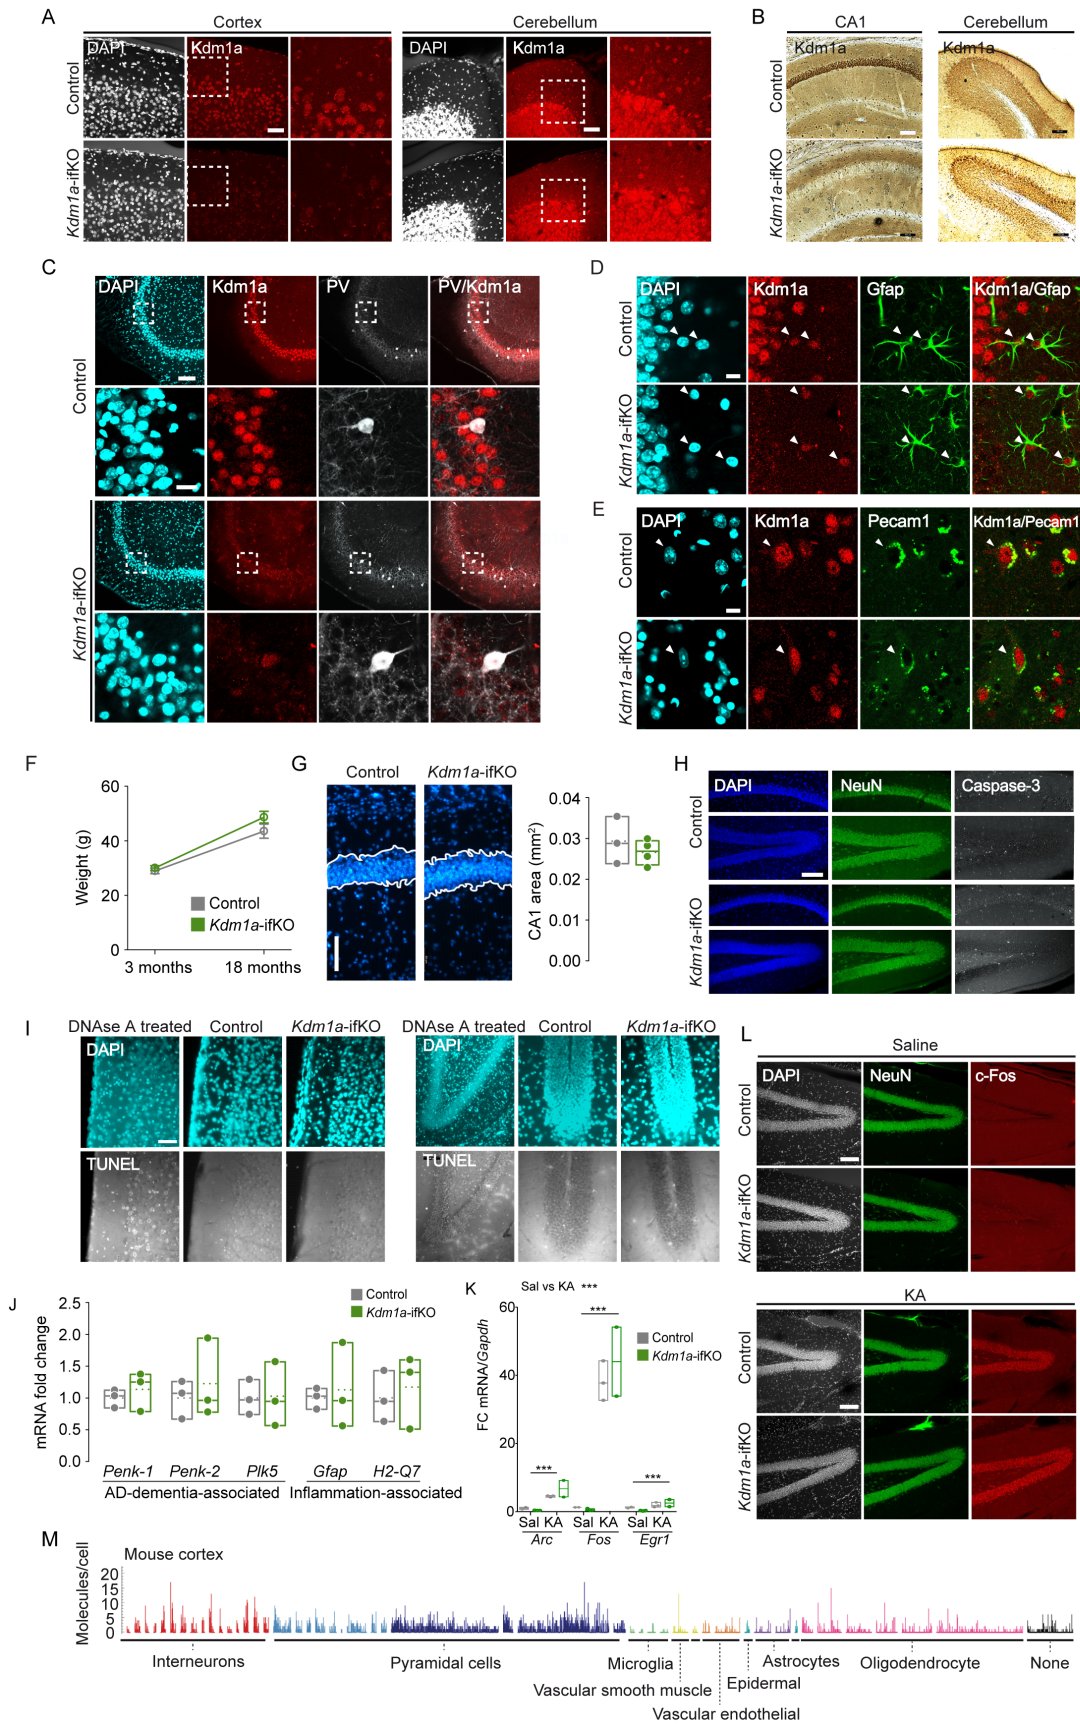

**Supplementary Figure 1. Forebrain-specific ablation of Kdm1a in principal neurons. A-B.** Immunofluorescence (A) and DAB immunostaining (B) using anti-Kdm1a antibody confirm the depletion of Kdm1a in cortical and hippocampal neurons of Kdm1a-ifKOs. Kdm1a is not eliminated in cerebellum and other brain areas in which the *Camk2a* driver is not active. Scale bar: 50  $\mu$ m (A), 100  $\mu$ m (B). **C.** Co-immunostaining using  $\alpha$ -Kdm1a and  $\alpha$ -parvalbumin (PV) shows the expression of Kdm1a in interneurons. Scale bar: 100  $\mu$ m and 20  $\mu$ m (insets). **D-E.** Co-immunostaining using  $\alpha$ -Kdm1a and  $\alpha$ -GFAP (D) or  $\alpha$ -Pecam1 (E) confirms the expression of Kdm1a in astrocytes and endothelial cells. Arrowheads highlight representative cells. Scale bar: 10  $\mu$ m. **F.** Body weight of mice across their lifespan (3 months: n = 13 for CT, n = 12 for Kdm1a-ifKO;  $t_{23} = -0.816$ , p = 0.423; 18 months: n = 12 for CT, n = 11 for Kdm1a-ifKO;  $t_{21} = -1.512$ , p = 0.145, t-test). **G.** DAPI staining and quantification of the thickness of the CA1 area in Kdm1a-ifKO and control littermates (n = 3 for WT, n = 4 for Kdm1a-ifKO; T = 14, p = 0.629, Mann-Whitney Rank Sum test). Scale bar 50  $\mu$ m. **H.** Staining for active Caspase-3 demonstrates that CA1 and dentate gyrus hippocampal neurons in Kdm1a-ifKOs do not display apoptosis. Scale bar: 100  $\mu$ m. **I.** TUNEL cell death assay in the cortex and hippocampus of WT and Kdm1a-ifKO mice. DNase A-treated slices from control mice are included as a control. Scale bar: 100  $\mu$ m. **J.** RT-qPCR assay for genes associated with cell death and neuro-inflammation did not show significant differences between Kdm1a-ifKOs and control littermates. **K.** RT-PCR analysis of mRNA levels for three representative IEGs (*Arc*, *Fos* and *Egr1*) in the hippocampus of Kdm1a-ifKOs and control littermates. mRNA samples were extracted 1 h after treatment with kainic acid (KA). We observed a significant effect of treatment (\*\*\*) (p > 0.001) but no significant effect of genotype. **L.** NeuN and Fos immunostaining of the dentate gyrus from 18-month-old Kdm1a-ifKO and control littermates (16 months after TMX) administered with saline or KA 1 hour before sacrificing. Scale bar: 100  $\mu$ m. **M.** Kdm1a expression in different cell types according to single-cell transcriptome data in the mouse cortex generated by the Linnarsson's lab<sup>1</sup>.

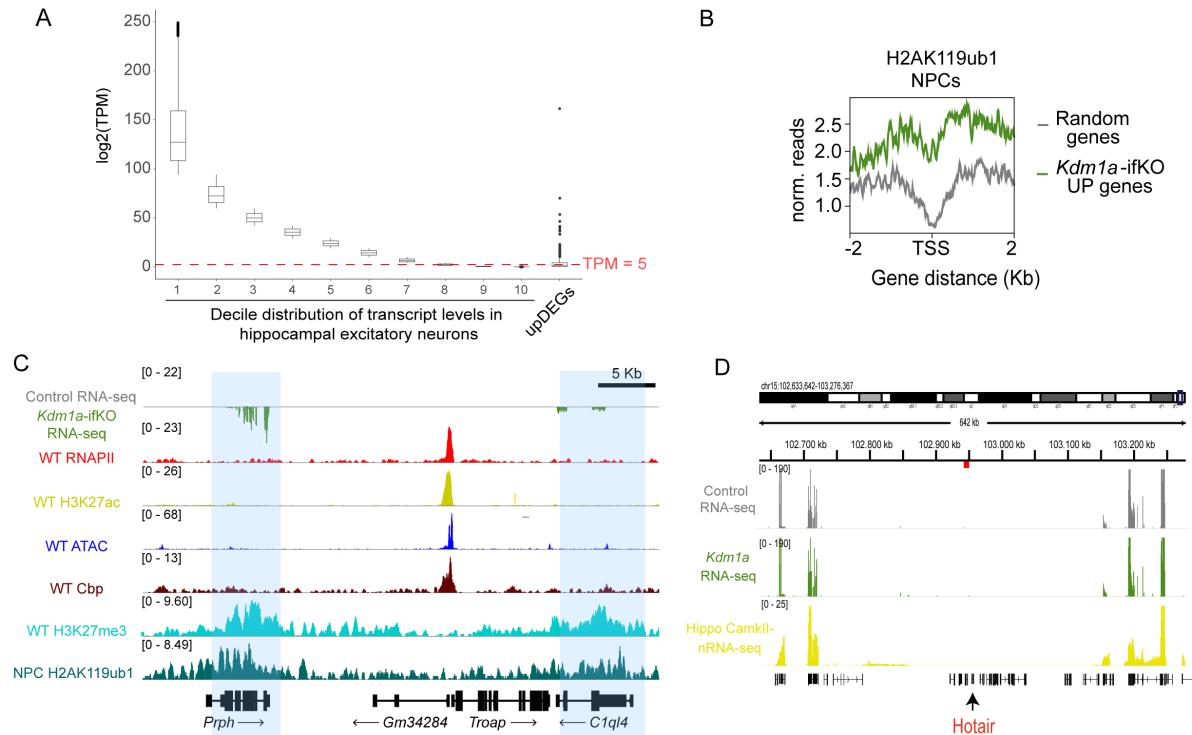

**Supplementary Figure 2. *Kdm1a* loss causes de-repression of PRC2-repressed nonneuronal genes** **A.** Box plot comparing the expression level of upDEGs with those of other genes. The series of decile ranks show the absolute expression value (in transcripts per million, TPM) of all coding transcripts detected in excitatory neurons of the adult mouse hippocampus<sup>2</sup>. The first decile box does not show the 248 genes with values above 250 TPMs. **B.** H2AK119ub1 enrichment in the chromatin of WT NPCs at the TSS (-2 to +2 Kb) of *Kdm1a*-ifKO upregulated compared to a similar number of randomly selected genes expressed in neurons. **C.** Genomic snapshot shows a representative example of two upregulated genes in *Kdm1a*-ifKOs, *Prph* and *C1ql4*, which are in close proximity to each other. Data range is shown in brackets. Arrows indicate the sense of transcription. All genomic profiles correspond to mouse hippocampus except for H2AK119ub1. **D.** Profile of *Hotair* expression comparing nuclear RNA from excitatory neurons and bulk hippocampal *Kdm1a*-ifKO and control samples of adult mouse brain.

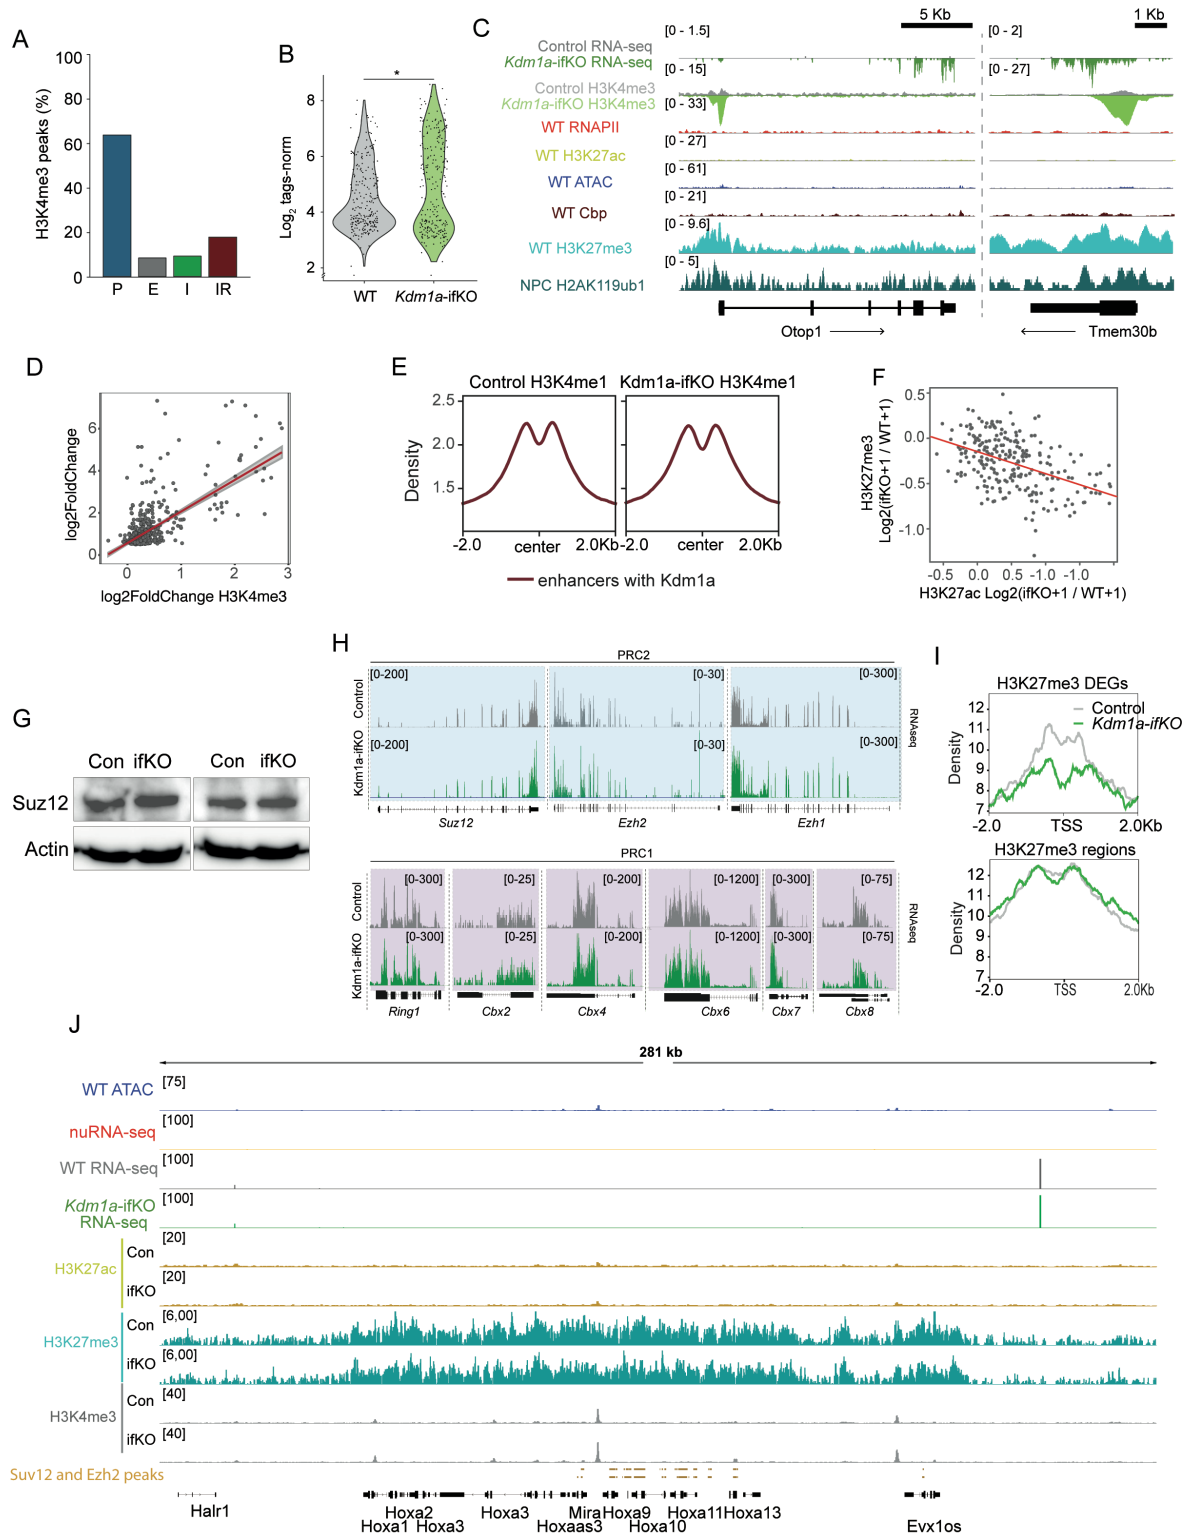

**Supplementary Figure 3. Dramatic changes in epigenetic profiles of Kdm1a-ifKOs.** **A.** Bar plot of the distribution of H3K4me3 DMRs in Kdm1a-ifKO mice. P = promoters; E = exons; I = introns; IR = intergenic regions. **B.** Violin plot shows that Kdm1a-ifKO upregulated genes display higher H3K4me3 levels in Kdm1a-ifKO mice than their control littermates ( $p < 0.05$ , Mann-Whitney Rank Sum test). **C.** Genomic snapshot of representative genes upregulated in Kdm1a-ifKO mice that exhibit an increment in H3K4me3 at their promoter regions, which are depleted of active genomic marks and display H3K27me3 and H2AK119ub1. Data range is shown in brackets. Arrows indicate the sense of transcription. All genomic profiles correspond to mouse hippocampus except for H2AK119ub1. **D.** Correlation between changes in H3K4me3 levels (log2FoldChange) and changes in upDEG transcript levels (log2FoldChange). Multiple lineal regression analysis:  $p$  value =  $3.02e^{-24}$ . **E.** Density plot of H3K4me1 signal in hippocampal chromatin of Kdm1a-ifKOs and control littermates at enhancer regions sorted by Kdm1a signal. **F.** Negative correlation between changes in H3K27me3 and H3K27ac in hippocampus of Kdm1a-ifKO compared with control littermate mice. **G.** Western blot of hippocampal protein extract shows no changes in the Suz12 PRC2 subunit protein level in Kdm1a-ifKO mice compared to control mice. Actin protein level as a control. **H.** Genomic snapshot indicating similar RNA levels of the major subunits of PRC2 (*Suz12*, *Ezh1*, and *Ezh2*) and PRC1 (*Ring1*, *Cbx2*, *Cbx4*, *Cbx6*, *Cbx7*, and *Cbx8*) from hippocampal RNA-seq samples from Kdm1a-ifKO and control mice. **I.** Changes in H3K27me3 levels in the chromatin of Kdm1a-ifKO and control littermates. To demonstrate the specificity of the effect we compared the set of upDEGs (upper graph) versus all genes displaying H3K27me3-high enrichment (lower graph). **J.** Genomic snapshot of representative the epigenetic profile of the *Hoxa* gene cluster in chromosome 6. Epigenetic profiles used: ATAC-seq and nuRNA-seq of mouse hippocampus excitatory neurons, RNA-seq; H3K27ac, H3K27me3 and H3K4me3 from hippocampus of Kdm1a-ifKO and control mice. The orange bars indicate the genomic coordinates of the peaks found in ChIP-seq of the PRC2 subunits Suz12 and Ezh2 in the chromatin of neural progenitors.

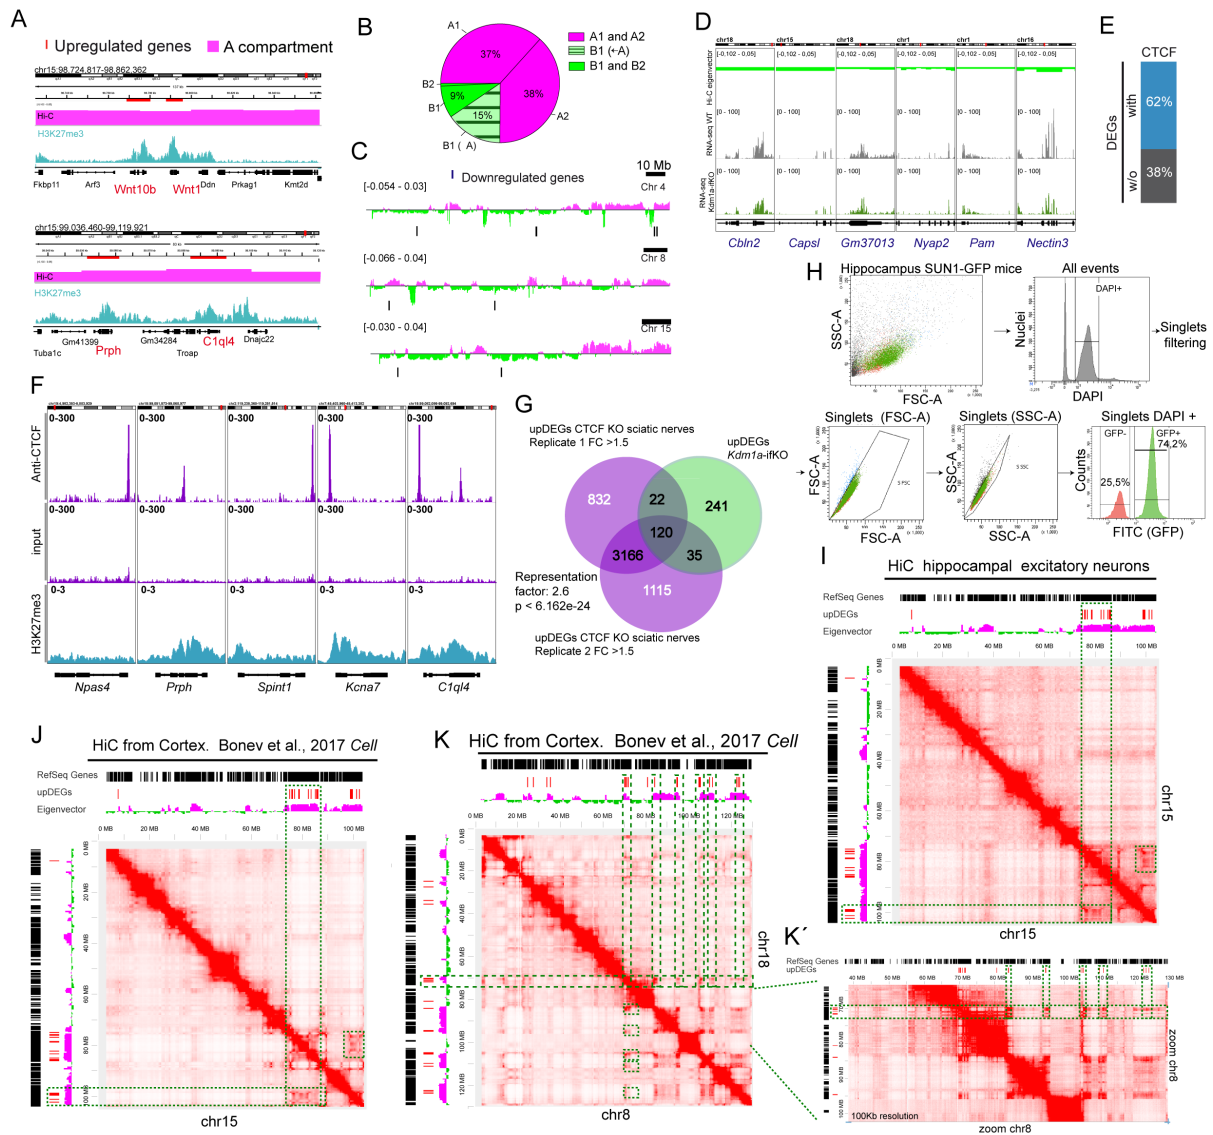

**Supplementary Figure 4. upDEGs cluster in silent stretches of euchromatin.** **A.** Zoomed snapshots showing the clustering of the upDEGs *Wnt10b*, *Wnt1*, *Prph* and *C1ql4*, their enrichment in H3K27me3 and location into compartment A. **B.** *Kdm1a*-regulated genes are distributed between the sub-compartments A1 and A2 in adult excitatory neurons with no clear preference for one sub-compartment. This analysis also revealed that 15% of the upDEGs that mapped into the A compartment at 25Kb resolution now mapped into the B1 compartment defined in the 250Kb map (see Methods). The result suggests that these genes locate near the boundary between the A and B compartments. **C.** Genomic snapshots of the A/B compartments in chromosomes 4, 8, and 15 indicating the location of genes downregulated (in blue) in *Kdm1a*-ifKO mice. **D.** Zoomed genomic snapshots showing some genes downregulated in *Kdm1a*-ifKO mice that are located in compartment B. **E.** Percentage of *Kdm1a*-ifKO upregulated genes with CTCF peak (5 kb down TSS and / or 1 kb up TSS gene) from the CTCF ChIP-seq previously published by Shen Y *et al.*<sup>3</sup> **F.** Snap view of CTCF binding and H3K27me3 signal at the promoter of *Kdm1a*-repressed genes. *Npas4* promoter is shown as a representative CTCF-bound neuronal gene. **G.** Overlap of upregulated genes (FC  $\geq 1.5$ ) in two replicates of CTCF KO mouse sciatic nerves published by Wang *et al.*<sup>4</sup> and *Kdm1a* upregulated gene (FC  $\geq 0.5$ ). The overlap between *bona fide* upregulated genes in CTCF (3,286 genes) and upDEGs is larger than expected by chance (representation factor: 2.6 p < 6.162e-24). **H.** Channel filtering of flow cytometry signal for the isolation of singlet nuclei of hippocampal excitatory neurons for ChIA-PET. The last panel shows the green fluorescence signal in Sun1-GFP<sup>-</sup> and Sun1-GFP<sup>+</sup> nuclei. **I-K.** Hi-C contact matrices of excitatory neurons from adult hippocampus (**I**)<sup>2</sup> and embryonic cortex (**J-K**)<sup>5</sup> visualized with Juicebox software. Intrachromosomal interactions of Chr5 and Chr8 are used as representative examples of the interactions of upregulated genes (red bars) in *Kdm1a*-ifKO mice.

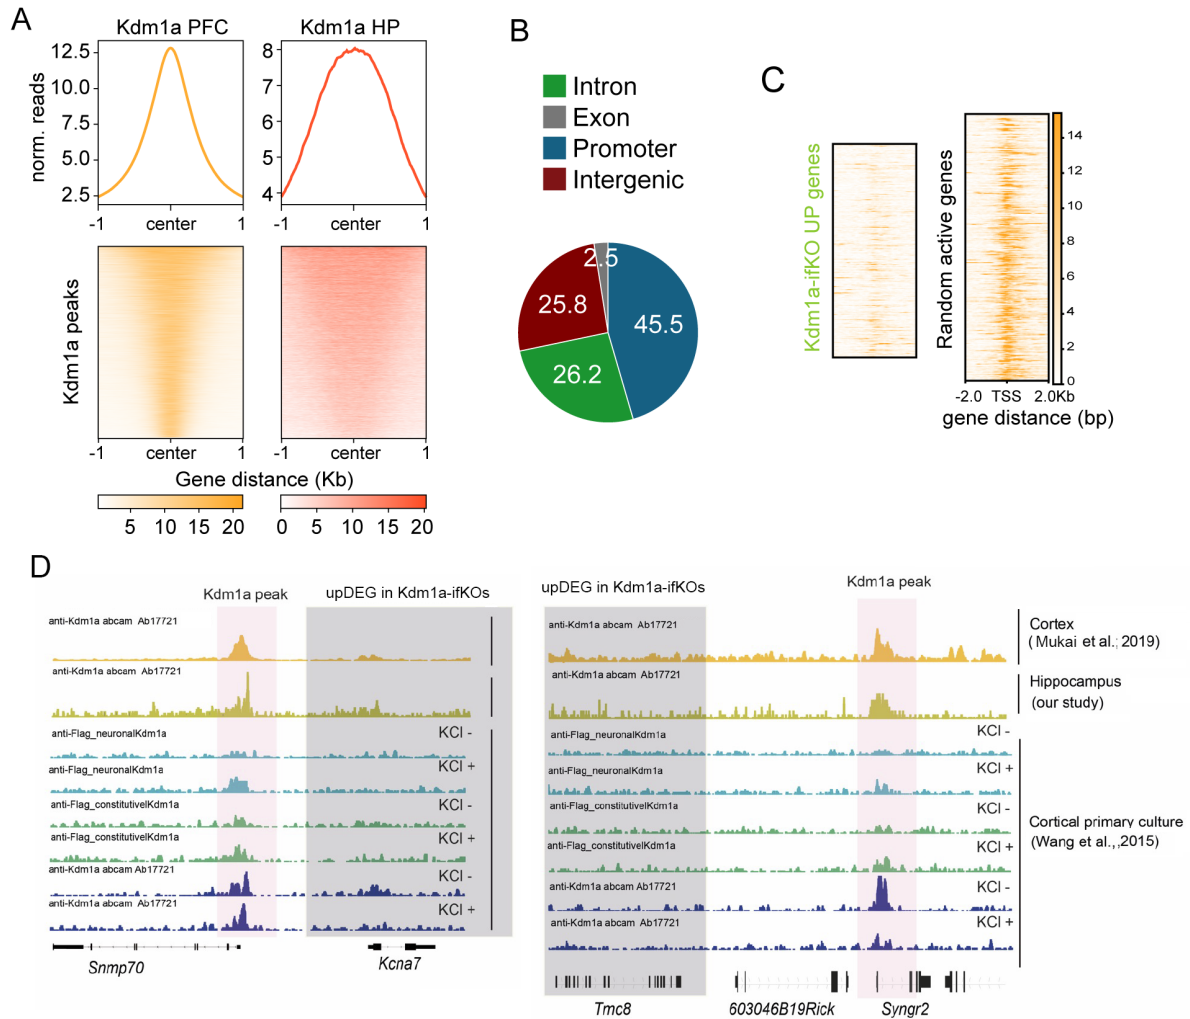

**Supplementary Figure 5. upDEGs are brought together by CTCF loops.** **A.** Graphs and their corresponding heatmaps evidence the similarity between Kdm1a ChIP-seq datasets from adult mouse prefrontal cortex (PFC) and hippocampus (HP). **B.** Pie Charts shows the distribution of Kdm1a peaks in the PFC of adult mice. **C.** Heatmap shows Kdm1a enrichment in TSS of upregulated genes compared to TSS of transcriptionally active genes in neurons. **D.** Genomic snapshots encompassing two upregulated differentially expressed genes (upDEGs): *Tmc8* and *Kcna7*. The comparison of the Kdm1a ChIP-seq profiles generated in three independent studies revealed enrichment in the same regions. In alignment with our findings (this study), the profiles from cortex (Mukai et al., 2019) and neuronal cultures (Wang et al., 2015) also revealed a weak binding of Kdm1a to the upDEGs.



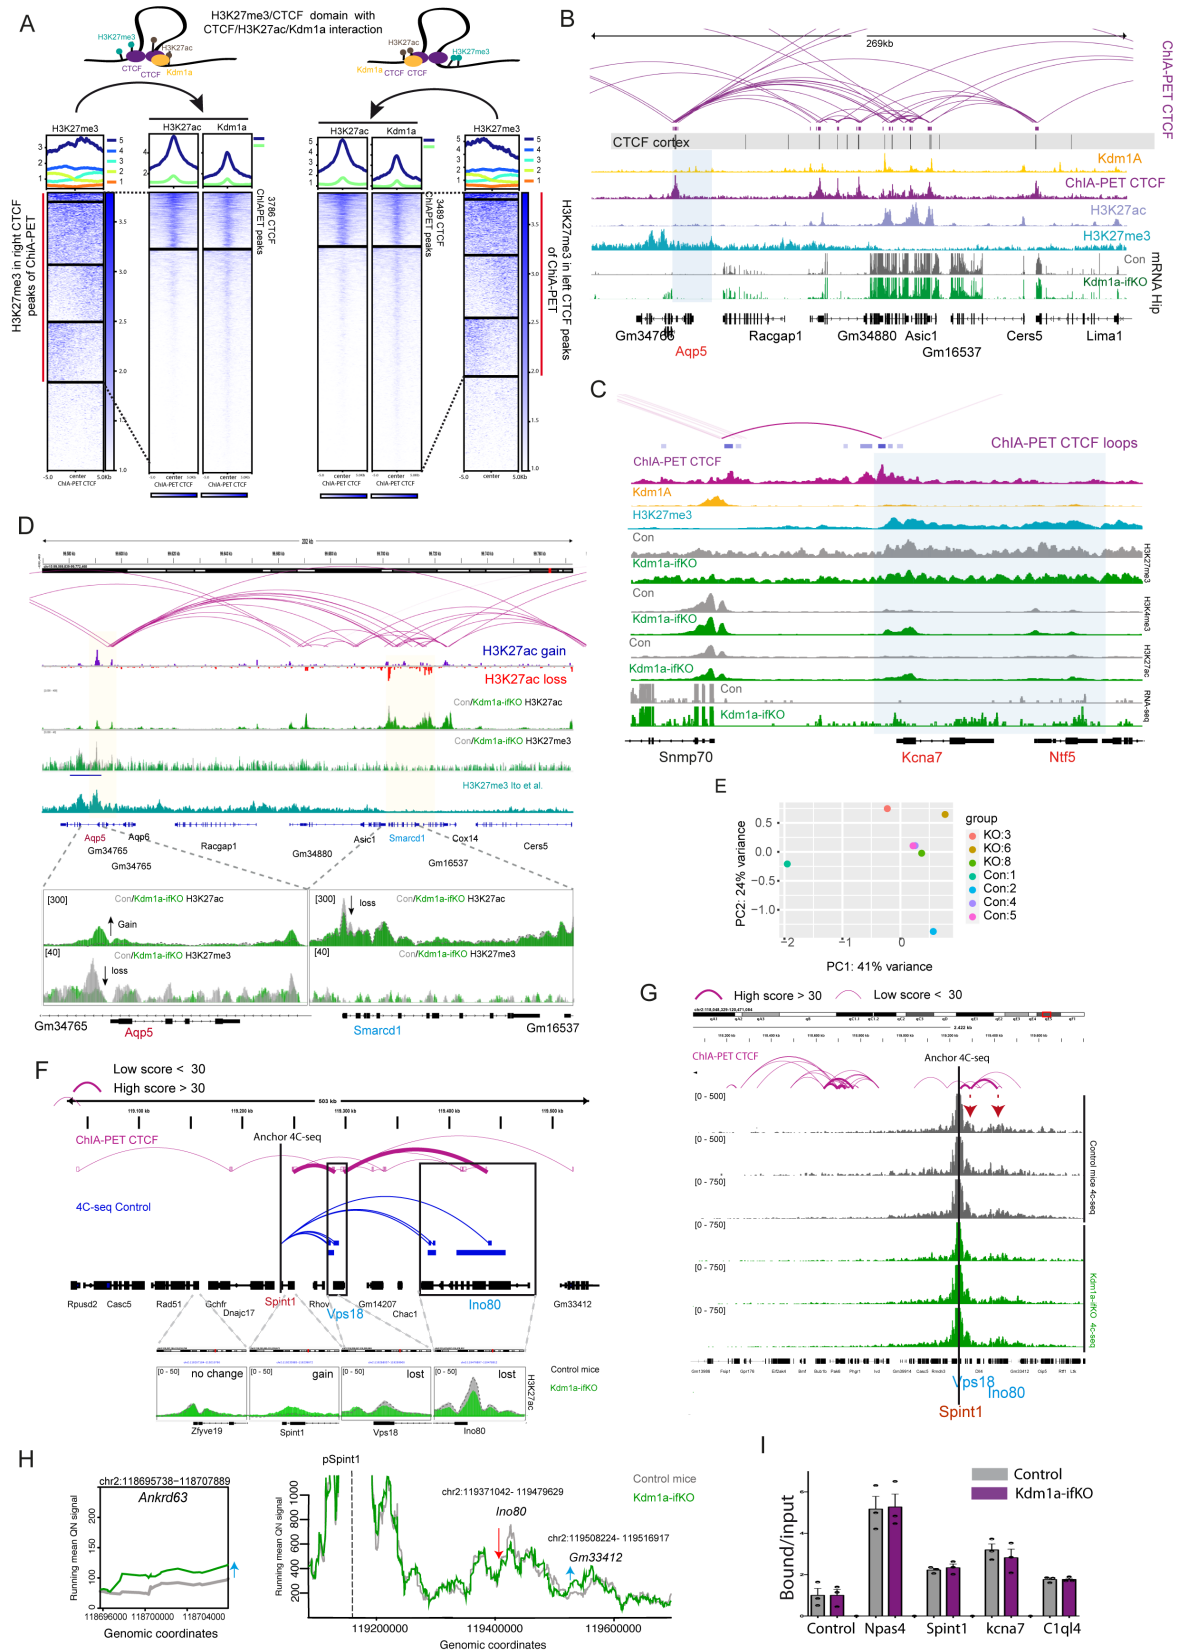

**Supplementary Figure 6. CTCF loops approach Kdm1a to its targets. A.** Schemes show the configuration of CTCF loops displaying an enrichment for H3K27me3 in either one or both sides (aprox. 70% of the total number of loops). Density plot for H3K27me3 in the CTCF-loops. Four H3K27me3-enriched clusters are observed. A subset of H3K27me3-rich regions interacts with regions enriched in Kdm1a and H3K27ac (3,786 regions, 20% of CTCF-loops enriched in H3K27me3) via CTCF-looping. **B-C.** Genomic snapshots of two representative upDEGs enriched in H3K27me3 (*Kcna7* and *Aqp5*, in red). CTCF-ChIA-PET revealed the topological association of Kdm1a with *Aqp5* (**B**) and *Kcna7* (**C**). CTCF binding is indicated by a blue square. Purple lines indicate CTCF-mediated interactions. **D.** Genomic profiles and CTCF ChIA-PET interactions at the representative upDEG *Aqp5* locus (in red). Note the topological association with regions enriched in H3K27ac. CTCF loops bring the H3K27me3-enriched gene *Aqp5* closer to *Smarcd1*, which is transcribed and enriched in H3K27ac. The bottom panels show the comparison of H3K27ac genomic profiles at *Aqp5* and *Smarcd1* in control and Kdm1a-ifKOs. **E.** Principal Component Analysis (PCA) of 4C-seq samples. **F.** 4C-seq interaction profiles using *Spint1* promoter as a viewpoint (anchor). Note the coincidence with CTCF-dependent interactions observed in the ChIA-PET of hippocampus excitatory neurons. *Vps18* and *Ino80* loci are label in red. **G.** Genomic snapshots of 4C-seq data in control mice (blue) confirm the CTCF-dependent interactions detected by ChIA-PET between the *Spint1* promoter and *Vps18* and *Ino80*. The comparison of H3K27ac profiles at *Spint1*, *Vps18* and *Ino80* in control and Kdm1a-ifKOs is shown on the bottom panels. **H.** Genomic Snapshot of 4C profiles generated with the 4See browser. These profiles represent the average normalized interaction frequency of the *Spint1* promoter with the genes *Ankrd65*, *Ino80* and *Gm33412*, that undergo significant changes in 4C-seq interactions between Kdm1a-ifKOs and control littermates. **I.** qPCR-ChIP analysis of three representative upregulated genes in Kdm1a-ifKOs: *Spint1*, *Kcna7* and *C1ql4* mice demonstrates no change in CTCF binding to the sites identified published by Shen and colleagues<sup>3</sup>.



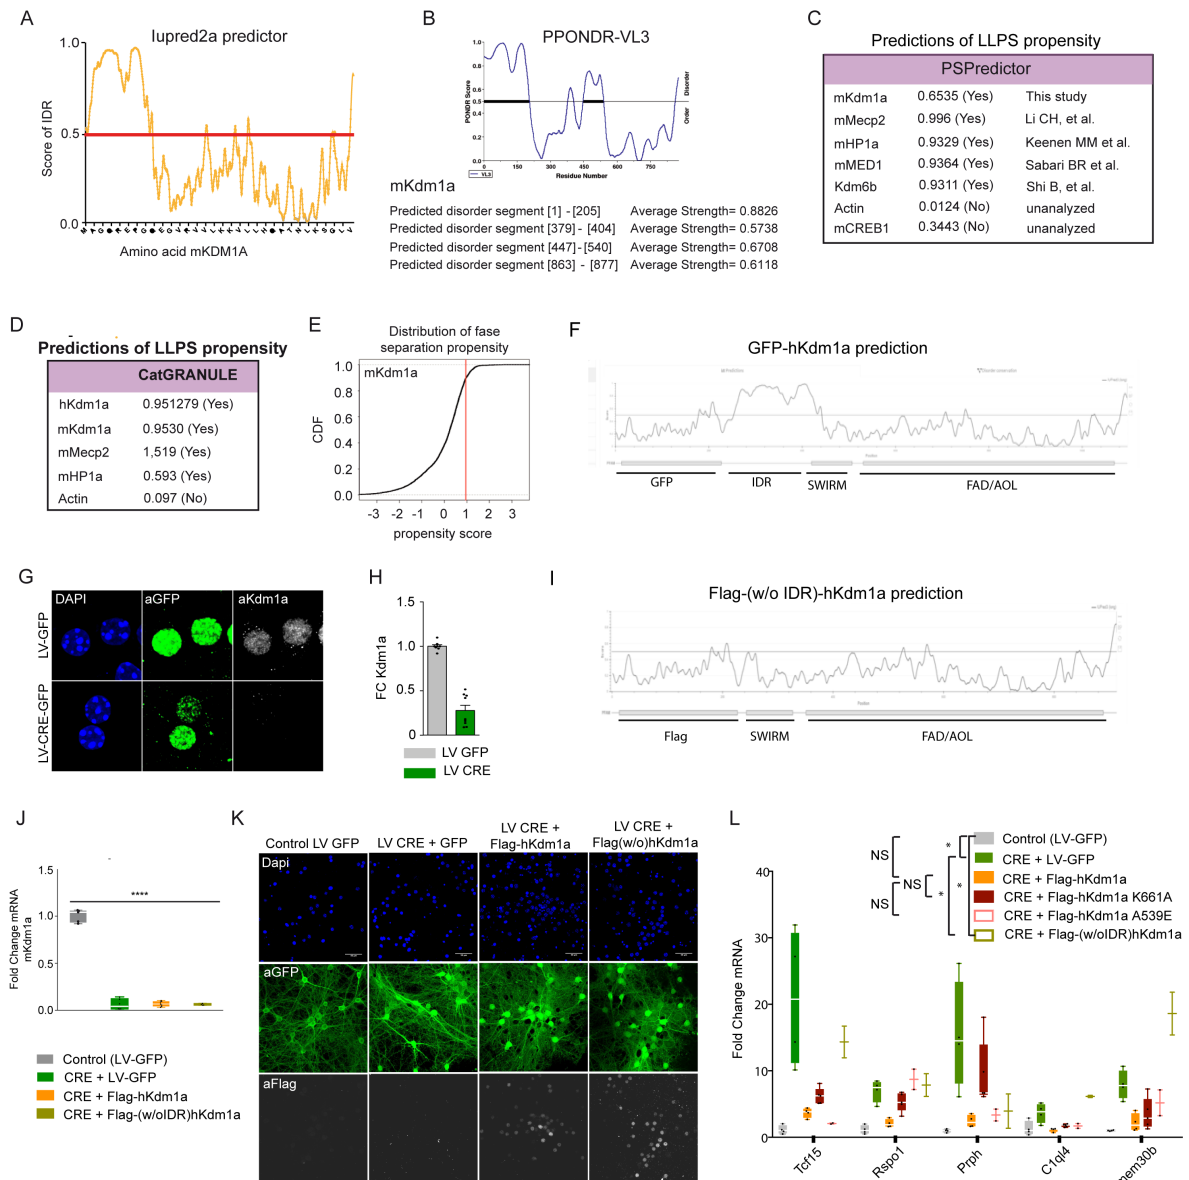

**Supplementary Figure 8. Kdm1a is involved in LLPS.** **A.** Intrinsically disordered region prediction in the mouse Kdm1a protein using IUPred2A<sup>6</sup>. **B.** Intrinsically disordered regions prediction using PONDR-VL3<sup>7</sup>. This algorithm detected a long IDR in the N-terminal region and a shorter IDR in the center region. **C.** PSPredictor indicates that Kdm1a may have LLPS properties. Its score is similar to those of proteins with known LLPS properties. As a negative control, we also show the scores for beta-actin and the TF CREB. **D-E.** Human and mouse Kdm1a score similarly to well-characterized PSPs, such as Mecp2 and HP1a, using the CatGRANULE algorithm. **F.** IDR prediction for GFP-hKdm1a using IUPred2A. **G.** Immunolabelling of hippocampal PNCs infected with GFP-expressing or GFP and Cre recombinase expressing lentiviruses were stained with anti-Kdm1a antibody. **H.** RT-qPCR assay demonstrates the reduced expression of Kdm1a 12 days after infection with LV-CRE-GFP in PNCs. **I.** IDR prediction for Flag-(w/o IDR)-hKdm1a using IUPred2A. In this truncated protein the algorithm does not predict any IDR. **J.** RT-qPCR assay demonstrates the loss of endogenous Kdm1a transcripts in PNCs infected with control LV-GFP or co-infected with LV-CRE plus control LV-GFP; or LV-CRE plus LV-Flag-hKdm1a; or LV-CRE plus LV-Flag (w/o IDR)-hKdm1a. Note that hKdm1a transcripts are not recognized with the primer pair used to quantify mKdm1a transcripts. **K.** Immunostainings using anti-Flag antibody demonstrate the presence of Flag-hKdm1a and Flag-(w/o-IDR) hKdm1a in PNCs infected with the indicated viruses. **L.** RT-qPCR assays demonstrate that human Kdm1a bearing mutations that affect H3K4me2 demethylase catalytic activity (K661A and K598E) largely prevented the activation of upDEGs, although less efficiently than hKdm1a. \*: p-value < 0.05 in multiple comparison test after one-way ANOVA.

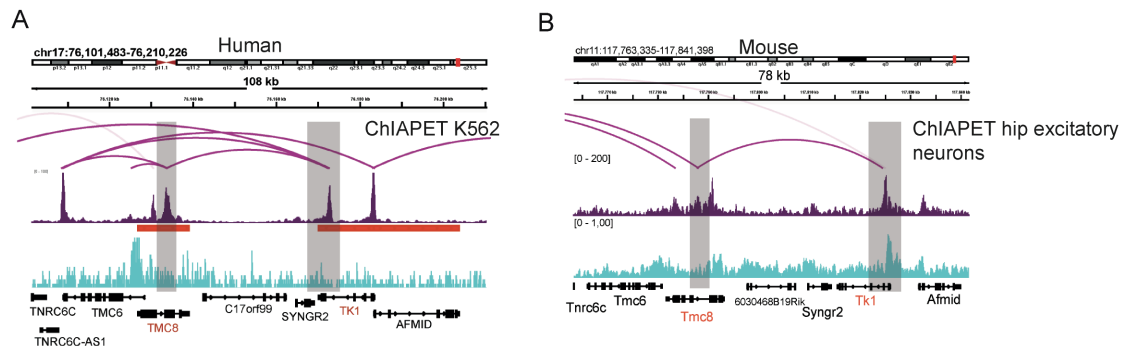

**Supplementary Figure 9. Spatial synteny of human and mouse chromatin structure in TMC8-TK1 cluster genes. A-B** Genomic snapshot of the interaction between the genes upregulated in Kdm1a-deficient neurons *Tmc8* and *Tk1* (**A**) and their human homologs (**B**), which are also upregulated during aging. The comparison of human CTCF ChIA-PET data<sup>8</sup> and the CTCF ChIA-PET data generated in mouse hippocampal excitatory neurons demonstrates the conservation of the 3D chromatin interaction between TMC8 and TK1, which could explain their co-upregulation during aging.

**Supplementary Table 1. Primer sequences****RT-qPCR primers pairs**

| <b>Target</b>  | <b>Forward</b>         | <b>Reverse</b>          |
|----------------|------------------------|-------------------------|
| <i>Kdm1a</i>   | ATACTGTGCTTGTCCACCGAG  | AGCTGTCGAGCTG           |
| <i>Penk1</i>   | GGCGTGACACTGGAATGT     | TCCCAGATTTTGAAGAAGGCA   |
| <i>Penk2</i>   | CCTCAAAGAAGCCCCAAC     | CGTTCTGCAGCTCTTTTGC     |
| <i>Plk5</i>    | CACCTGTGTTTGCCTTTCCC   | TTTTGAGGTAAAGGGACAAGGTG |
| <i>Gfap</i>    | GGACAACCTTGCACAGGACCTC | TCAAATCCACACGAGCCA      |
| <i>H2-Q7</i>   | AGGAGCAGAATTACACATGCCA | CGCCATGTTGGAGACAGTGTAT  |
| <i>C1ql4</i>   | TCGACCTCACACTTCTTGCC   | CAGCCGCGGAATCCCTAATA    |
| <i>Prph</i>    | TCGATTTCTCCATGGCCGAG   | CGGTCGTTGAGCTCCTGTAA    |
| <i>Spint1</i>  | TGCACCACTCAGAACTGCAA   | GAGCGAAGTTGCACACGAAG    |
| <i>Tcf15</i>   | TCCATTTCGGTTATGCCTCTC  | CACCTGGCAGTCTTCAGAGTC   |
| <i>Ltbp2</i>   | GATGGAGATGTGGCAAAAAGA  | GTGGAGCAAGAGAGGGTTTG    |
| <i>Bmp8a</i>   | GAGGCAGGAAACCCTTCTATG  | AGGACAGAGGAACTGGGAAA    |
| <i>Mixl1</i>   | TCCCTGAGTGCATCCTCAAC   | CGTCTGCACATCTGGTTCTC    |
| <i>Rspo1</i>   | GTGGATTCAAGCAGGACAGG   | CTGGGTCAGTGGCAGGAG      |
| <i>Tcf24</i>   | AACGCTCCAGCCTCTAGATTG  | ACCCAGTTAAGGTAGGCGAC    |
| <i>Kcna7</i>   | CTTCGATGCGGTGCTCTACT   | CAGCCCGTAGAAGGACACC     |
| <i>Tmem30b</i> | GCATGACAAAGCCCATGACG   | GGCACCTACCGTGTCAACAT    |

**ChIP-qPCR primers pairs**

| <b>Target</b> | <b>Forward</b>        | <b>Reverse</b>        |
|---------------|-----------------------|-----------------------|
| C1ql4         | TCGACCTCACACTTCTTGCC  | CAGCCGCGGAATCCCTAATA  |
| Tmem30b       | GCATGACAAAGCCCATGACG  | GGCACCTACCGTGTCAACAT  |
| Prph          | TCGATTTCTCCATGGCCGAG  | CGGTCGTTGAGCTCCTGTAA  |
| HPCA          | GCATGCGTAATCAGTTCTGGA | CTGCACAGGAAGGAGTCAGA  |
| Kcna7         | TGGTACACATCTGTCATCCCA | GCCTCTGTATCTCTGCCT    |
| Spint1        | CAGGGGTTAATGCCAGTCCC  | CTCTGGCTGCACGGAAGATT  |
| Spint1 CTCF   | GGTGAAGTGGCTAGAGGAGGA | ACCGAGAGCAGAGATCCAGA  |
| Kcna7 CTCF    | CGAGATCCCTTTCCCGAAA   | GATGCGTAGGGTCACTGTCTG |
| C1ql4 CTCF    | TCTCAGCCCTCACCGTATGT  | ACCCCTGTTTACCCCATCAC  |
| Npas4 CTCF    | CTGCCTCGATCCGCCTT     | GTCTCTAAAACGAGCCCCC   |

**hKdm1a IDR depletion**

|         |                                        |                     |
|---------|----------------------------------------|---------------------|
| Forward | GACAGTCCTCGAGTTCAGAGCCGA<br>CTTCCTCATG | GGTTGATTGCGGCCGCTCA |
|---------|----------------------------------------|---------------------|

**4C-seq primer pair**

|                      |                                                   |
|----------------------|---------------------------------------------------|
| 4C Reading p1 Spint1 | ACTGGAGTTCAGACGTGTGCTCTTCCGATCTCCGGAAGTTCTGCTGGGC |
| non_blind p1 Spint1  | TACACGACGCTCTTCCGATCTATAGGCTGCGTTTGTGTAAAC        |

## Supplementary References

1. Zeisel, A. *et al.* Brain structure. Cell types in the mouse cortex and hippocampus revealed by single-cell RNA-seq. *Science* (80-. ). **347**, 1138–1142 (2015).
2. Fernandez-Albert, J. *et al.* Immediate and deferred epigenomic signatures of in vivo neuronal activation in mouse hippocampus. *Nat Neurosci* **22**, 1718–1730 (2019).
3. Shen, Y. *et al.* A map of the cis-regulatory sequences in the mouse genome. *Nature* **488**, 116–120 (2012).
4. Wang, J. *et al.* CTCF-mediated chromatin looping in EGR2 regulation and SUZ12 recruitment critical for peripheral myelination and repair. *Nat. Commun.* **11**, 4133 (2020).
5. Bonev, B. *et al.* Multiscale 3D Genome Rewiring during Mouse Neural Development. *Cell* **171**, 557-572 e24 (2017).
6. Mészáros, B., Erdős, G. & Dosztányi, Z. IUPred2A: context-dependent prediction of protein disorder as a function of redox state and protein binding. *Nucleic Acids Res.* **46**, W329–W337 (2018).
7. Peng, K. *et al.* Optimizing long intrinsic disorder predictors with protein evolutionary information. *J. Bioinform. Comput. Biol.* **03**, 35–60 (2005).
8. Fullwood, M. J., Han, Y., Wei, C., Ruan, X. & Ruan, Y. Chromatin Interaction Analysis Using Paired-End Tag Sequencing. *Curr. Protoc. Mol. Biol.* **89**, (2010).
