# Supplementary material for: Kdm1a safeguards the topological boundaries of PRC2-repressed genes and prevents aging-related euchromatinization in neurons
Source: PubMed Central journal article supplement (PMC10920760; doi:10.1038/s41467-024-45773-3), 2024-03-07
Supplement: 41467_2024_45773_MOESM3_ESM.pdf [file 41467_2024_45773_MOESM3_ESM.pdf]

## **Description of Additional Supplementary Files**

File Name: Supplementary Data 1

Description: Differentially expressed genes in Kdm1a-*if*KO neurons of the adult mouse brain.

File Name: Supplementary Data 2

Description: CTCF ChIA-PET interactions with a score  $\geq 3$ .

File Name: Supplementary Data 3

Description: Statistic of 4C-seq experiment.

File Name: Supplementary Data 4

Description: Kdm1a-dependent genes that exhibit age-dependent expression changes in the human brain.
